# Supplementary material for: Blending Baeyer–Villiger monooxygenases: using a robust BVMO as a scaffold for creating chimeric enzymes with novel catalytic properties
Source: Royal Society of Chemistry journal article supplement (doi:10.1039/c2cc17656d), 2012-01-01
Supplement: c2cc17656d.pdf [file c2cc17656d.pdf]

# BLENDING BAEYER-VILLIGER MONOOXYGENASES: USING A ROBUST BVMO AS A SCAFFOLD FOR THE CREATION OF CHIMERIC ENZYMES WITH NOVEL CATALYTIC PROPERTIES

Hugo L. van Beek, Gonzalo de Gonzalo, Marco W. Fraaije \*

Laboratory of Biochemistry, Groningen Biomolecular Sciences and Biotechnology Institute,  
University of Groningen, Nijenborgh 4, 9747 AG Groningen, The Netherlands.

Fax: (+31) 50-3634165

E-mail: m.w.fraaije@rug.nl

## Supporting Information

### Contents

|                                 |     |
|---------------------------------|-----|
| 1. General.....                 | S2  |
| 2. Experimental procedures..... | S4  |
| 3. GC and HPLC analyses.....    | S5  |
| 4. Kinetic measurements.....    | S6  |
| 5. ThermoFAD measurements.....  | S7  |
| 6. Protein sequences.....       | S8  |
| 7. Supporting references.....   | S10 |

## 1. General

Enzymes were obtained from New England Biolabs and Clontech. Oligonucleotides were synthesized by Sigma-Aldrich and sequencing of the created constructs was done at GATC (Konstanz, DE). pCRE2-PAMO was mutated into pCRE2-PAMO-RsrII using site-directed mutagenesis, introducing a silent mutation in the codon for G436. The resulting plasmid was cut with PvuII/RsrII or RsrII/HindIII to create the backbone for the pCRE-xxx-PAMO and pCRE-PAMO-xxx chimeras respectively. Inserts were made using PCR, with 15bp overlaps with the backbone to facilitate In-Fusion (Clontech, Mountain View, CA USA) cloning with the backbones, according to the manufacturer's instructions. The resulting constructs were transformed to CaCl<sub>2</sub> competent *E.coli* Top10 cells. For the chimeras based on metagenomic sequences, three pieces were synthesized by GeneArt (Germany), cut with RsrII/HindIII and ligated into the backbone using Quickligase (Roche, Basel, CH). Overexpression and purification of the enzymes was done as previously described.<sup>1</sup>

Substrates **1-2**, ( $\pm$ )-**3-4** and **5**, as well as all other reagents were purchased from Sigma-Aldrich, Acros or Alfa Aesar and were used as provided unless otherwise stated. Mass spectra were recorded on an AEI-MS-902 mass spectrometer. NMR spectra were obtained on Varian AMX400 spectrometer (<sup>1</sup>H: 400 MHz; <sup>13</sup>C 100.59 MHz). Chemical shifts ( $\delta$ ) are given in parts per million (ppm) relative to the residual solvent peak, while the coupling constants ( $J$ ) are given in Hz. Gas chromatography was carried out on a Hewlett-Packard 6890 Series using a flame ionization detector. For all the analyses, the injector temperature was 225 °C and the FID temperature was 250 °C. HPLC was performed on a Shimadzu LC-10ADVP equipped with a Shimadzu SPD-M10AVP diode array detector. UV-Vis spectra were obtained using a Hewlett-Packard HP 8543 FT spectrophotometer in a 1.0 cm quartz cuvette.

Racemic methyl phenyl sulfoxide and benzyl phenyl sulfoxide were prepared by treatment of the starting sulfides with H<sub>2</sub>O<sub>2</sub> in methanol at room temperature (yields higher than 80%). Lactones were synthesized from the starting ketones by treatment with *m*CPBA in CH<sub>2</sub>Cl<sub>2</sub> at 0°C (yields range: 56-81%). All other reagents and solvents were of the highest quality grade available and were obtained from Sigma-Aldrich-Fluka and Acros Organics. The absolute configurations of the final sulfoxides and lactones is based on literature data.<sup>2</sup>

## **2. Experimental procedures**

### **2.1. General procedure for the enzymatic oxidation of substrates 1-2, (±)-3-4 and 5 employing the native and chimeric BVMOs.**

Unless otherwise state, substrates (5-10 mM) were dissolved in 50 mM Tris/HCl pH 7.5, containing 5% DMSO. Subsequently, 100  $\mu$ M NADPH, 4  $\mu$ M phosphite dehydrogenase, 10 mM sodium phosphite and 4 to 10  $\mu$ M BVMO was added. The mixture was shaken on at 250 rpm at room temperature. Reactions were stopped by extraction with ethyl acetate ( $2 \times 0.5$  mL) with 0.1% mesitylene as internal standard, and the organic layer was dried over  $\text{MgSO}_4$ . Conversions and enantiomeric excesses of the oxidized products were determined by GC and HPLC.

### 3. GC and HPLC analyses.

The following columns were used for the determination of conversions and enantiomeric excesses of the sulfoxides by GC: A: GT-A (Alltech, 30 m x 0.25 mm x 0.25  $\mu$ m), B: Hewlett Packard HP-1 (Agilent, 30m x 0.32 mm x 0.25 $\mu$ m) or C: Chiralsil Dex CB (Varian, 25 m x 0.32 mm x 0.25  $\mu$ m).

**Table S1.** Determination of conversion and enantiomeric excess values by GC.

| Substrate     | Program <sup>a</sup>   | Column | $t_R$ (min) substrates                 | $t_R$ (min) products                                                                                               |
|---------------|------------------------|--------|----------------------------------------|--------------------------------------------------------------------------------------------------------------------|
| <b>1</b>      | 40/5/10/200            | A      | 7.3                                    | 13.6 ( <i>R</i> ); 15.6 ( <i>S</i> )                                                                               |
| <b>2</b>      | 100/5/5/200/5          | B      | 23.1                                   | 28.9                                                                                                               |
| (±)- <b>3</b> | 35/0/5/130/0/15/200    | A      | 9.7                                    | 16.9 (normal)<br>17.1 (abnormal)                                                                                   |
| (±)- <b>3</b> | 130 isotherm           | C      | --                                     | 10.8 ( <i>1R,5S</i> )-abn<br>11.3 ( <i>1R,5S</i> )-norm<br>11.6 ( <i>1S,5R</i> )-abn<br>11.9 ( <i>1S,5R</i> )-norm |
| (±)- <b>4</b> | 40/10/3/180/5          | A      | 23.5 ( <i>R</i> )<br>23.6 ( <i>S</i> ) | 30.6 ( <i>S</i> )<br>30.9 ( <i>R</i> )                                                                             |
| <b>5</b>      | 190/1/4/235/5/30/300/3 | B      | 19.4                                   | 18.9                                                                                                               |

<sup>a</sup> Program: initial T (°C)/ time (min)/ slope (°C/min)/T (°C)/ time (min).

For the determination of the enantiomeric excesses of the benzyl phenyl sulfoxide by HPLC, a Chiralcel OD (0.46 cm x 25 cm) column from Daicel was employed.

**Table S2.** Determination of enantiomeric excess values by HPLC.

| Substrate | Flow rate<br>(mL min <sup>-1</sup> ) | T (°C) | Eluent <sup>a</sup>      | $t_R$ (min)                          |
|-----------|--------------------------------------|--------|--------------------------|--------------------------------------|
| <b>2</b>  | 0.5                                  | 25     | <i>n</i> -hexane-IPA 9:1 | 19.2 ( <i>R</i> ); 22.4 ( <i>S</i> ) |

<sup>a</sup>The experiments was performed with isocratic eluent.

#### 4. Kinetics measurements

Oxidation rates for the three wild type enzymes as well as for the three chimeric enzymes were determined by observing the depletion of NADPH, monitoring its absorbance at 340 nm in a solution containing 0.05 to 0.5  $\mu\text{M}$  BVMO, 100  $\mu\text{M}$  NADPH and 0 to 1 mM phenylacetone (employed as model substrate) dissolved in 50 mM Tris-HCl pH 7.5. Observed rates were fitted to the Michaelis-Menten equation, using the SigmaPlot software package.

**Table S3.** Determination of the catalytic constants of the different BVMOs employing phenylacetone as substrate.

| Enzyme  | $k_{\text{cat}}$ ( $\text{s}^{-1}$ ) | $K_{\text{M}}$ ( $\mu\text{M}$ ) |
|---------|--------------------------------------|----------------------------------|
| PAMO    | 2.3                                  | 80                               |
| STMO    | 0.6                                  | 106                              |
| CHMO    | 1.5                                  | 633                              |
| PASTMO  | 0.6                                  | 163                              |
| PACHMO  | n/a <sup>a</sup>                     | n/a <sup>a</sup>                 |
| PAMEMO1 | 0.5                                  | 39                               |

<sup>a</sup> Observed rate similar to uncoupling rate ( $0.1 \text{ s}^{-1}$ ).

## 5. ThermoFAD method<sup>4</sup>

Experiments were performed using a BioRad (Hercules, CA, USA) RT-PCR machine and BioRad RT-PCR plates. The excitation wavelength was set between 470 and 500nm and a SYBR-green filter (523–543 nm) was used for measuring fluorescence emission. Unfolding curves were measured between 20 °C and 95 °C (1 °C min<sup>-1</sup>) with fluorescence intensity measured every 0.5 °C after a 10 s delay for temperature stabilization. The fluorescence intensity was plotted against the temperature to obtain a sigmoidal curve. The reported T<sub>m</sub> values were determined as the maximum of the derivative of this sigmoidal curve. 20 µl solutions of 5 µM enzyme in 50 mM Tris/HCl pH 7.5 were used.

## 5. Protein sequences

All proteins were created as fusion enzymes, linked at the N-terminus to PTDH,<sup>3</sup> with a N-terminal poly-His tag.

### >PAMO, *Thermobifida fusca*, YP\_289549, GI:72161892

MAGQTTVDSRRQPPEEVDVLVVGAGFSGLYALYRLRELGRSVHVIETAGDVGGVWYWNRYPGARCDIESI  
EYCYSFSEEVLQEWNNWTERYASQPEILRYINFDVADKFDLRSGITFHTTVTAAAFDEATNTWTVDTNHGDR  
IRARYLIMASGQLSVPQLPNFPGLKDFAGNLYHTGNWPHEPVDVDFSGQRVGVIGTGSSGIQVSPQIAKQAA  
ELFVVFQRTPHFAVPARNAPLDPEFLADLKKRYAEFREESRNTPGGTHRYQGPKSALEVSDEELVETLERY  
WQEGGPDILAAAYRDILRDRDANERVAEFIRNKIRNTVDRDPEVAERLVPKGYPFGTKRLLILEIDYYEMFNR  
DNVHLVDTLASAPIETITPRGVRTSEREYELDSLVLATGFDALTGALFKIDIRGVGNVALKEKWAAGPRTY  
LGLSTAGFPNLFFFIAGPGSPSALSANMLVSIHQHVEWVTDHIAYMFKNGLTRSEAVLEKEDEWVEHVNEIA  
DETLYPMTASWYTGANVPGKPRVFMFLYVGGFHRYRQICDEVAAGYEGFVLT

### >CHMO, *Acinetobacter* sp. NCIMB 9871, BAA86293.1 GI:6277322

MSQKMDFDAIVIGGGFGLYAVKKLRDELELKVQAFDKATDVAGTWYWNRYPGALSDETETHLYCYSWDKE  
LLQSLEIKKKYVQGPVDRKYLQQVAEKHDLKKSQYQFNTAVQSAHYNEADALWEVTTEYGDKYRTARFLITA  
LGLLSAPNLPNIKGINQFKGELHHTSRWPDDVSFEGKRVGVIGTGSTGVQVITAVAPLAKHLTVFQRSAQ  
YSVPIGNDPLSEEDVKKIKDNYDKIWDGVWNSALAFGLNESTVPAMSVSAEERKAVFEKAWQTGGGFRFM  
FETFQDIATNMEANIEAQNFIKGKIAEIVKDPALIAQKLMPPQDLYAKRPLCDSGYNTFNDRDNVRLLEDVKA  
NPIVEITENGVKLENGDFVELDMLICATGFDVADGNVVRMDIQGKNGLAMKDYWKEGPSSYMGVTVNNYP  
NMFVVLGPNPFTNLPPSIESQVEWISDTIQYTVENNVESIEATKEAEEQWTQTCANIAEMTLFPAQSW  
IFGANIPGKKNVYFYLGGLKEYRSALANCKNHAYEGFDIQLQRSDIKQPANA

### >STMO, *Rhodococcus rhodochrous* BAA24454.1 GI:2804298

MNGQHPRSVVTPADATTTGTTSDYDVVVVVGAGIAGLYAIHRFRSQGLTVRAFEAASGVGGVWYWNRYPGARC  
DVESIDYSYSFSPELEQEWNNWSEKYATQPEILAYLEHVADRFDLRRDIRFDTRVTSAVLDEEGLRWTVRT  
DRGDEVSARFLVVAAGPLSNANTPAFDGLDRFTGDIVHTARWPHDGVDFTGKRVGVIGTGSSGIQSIPII  
AEQAEQLFVVFQRSANYSIPAGNVPLDDATRAEQKANYAERRRSLRESGGGSPHRPHPKSALEVSEEERRA  
VYEERWKLGGVLFKAFDPDQLTDPAAANDTARAFWEEKIRAVVDDPAVAELLPKDHAIGAKRIVTDSGY  
ETYNRDNVELVDLRSTPIVGMDETGIIVTGAHYDLDMLVILATGFDAMTGS�DKLEIVGRRGRTLKETWAA  
GPRTYLGLGIDGFNPNFNLTPGSPSVLANMVLHSELHVDWVADAIAYLDARGAAGIEGTPEAVADWVEE  
CRNRAEASLLNSANSWYLGANIPGRPRVFMPLGGFGVYREIITEVAESGYKGFALLEG

### >PASTMO chimera

MAGQTTVDSRRQPPEEVDVLVVGAGFSGLYALYRLRELGRSVHVIETAGDVGGVWYWNRYPGARCDIESI  
EYCYSFSEEVLQEWNNWTERYASQPEILRYINFDVADKFDLRSGITFHTTVTAAAFDEATNTWTVDTNHGDR  
IRARYLIMASGQLSVPQLPNFPGLKDFAGNLYHTGNWPHEPVDVDFSGQRVGVIGTGSSGIQVSPQIAKQAA  
ELFVVFQRTPHFAVPARNAPLDPEFLADLKKRYAEFREESRNTPGGTHRYQGPKSALEVSDEELVETLERY  
WQEGGPDILAAAYRDILRDRDANERVAEFIRNKIRNTVDRDPEVAERLVPKGYPFGTKRLLILEIDYYEMFNR  
DNVHLVDTLASAPIETITPRGVRTSEREYELDSLVLATGFDALTGALFKIDIRGVGNVALKEKWAAGPRTY  
LGLSTAGFPNLFFFIAGPGSPSVLANMVLHSELHVDWVADAIAYLDARGAAGIEGTPEAVADWVEE  
CRNRAEASLLNSANSWYLGANIPGRPRVFMPLGGFGVYREIITEVAESGYKGFALLEGKLGPEQKLISEEDLNS  
AVDHHHHHH

### >PACHMO chimera

MAGQTTVDSRRQPPEEVDVLVVGAGFSGLYALYRLRELGRSVHVIETAGDVGGVWYWNRYPGARCDIESI  
EYCYSFSEEVLQEWNNWTERYASQPEILRYINFDVADKFDLRSGITFHTTVTAAAFDEATNTWTVDTNHGDR  
IRARYLIMASGQLSVPQLPNFPGLKDFAGNLYHTGNWPHEPVDVDFSGQRVGVIGTGSSGIQVSPQIAKQAA  
ELFVVFQRTPHFAVPARNAPLDPEFLADLKKRYAEFREESRNTPGGTHRYQGPKSALEVSDEELVETLERY  
WQEGGPDILAAAYRDILRDRDANERVAEFIRNKIRNTVDRDPEVAERLVPKGYPFGTKRLLILEIDYYEMFNR  
DNVHLVDTLASAPIETITPRGVRTSEREYELDSLVLATGFDALTGALFKIDIRGVGNVALKEKWAAGPRTY  
LGLSTAGFPNLFFFIAGPNGPFTNLPPSIESQVEWISDTIQYTVENNVESIEATKEAEEQWTQTCANIAEM  
TLFPAQSWIFGANIPGKKNVYFYLGGLKEYRSALANCKNHAYEGFDIQLQRSDIKQPANA

### >PAMEMO1 chimera – containing a part from ABEF01054497

MAGQTTVDSRRQPPEEVDVLVVGAGFSGLYALYRLRELGRSVHVIETAGDVGGVWYWNRYPGARCDIESI  
EYCYSFSEEVLQEWNNWTERYASQPEILRYINFDVADKFDLRSGITFHTTVTAAAFDEATNTWTVDTNHGDR  
IRARYLIMASGQLSVPQLPNFPGLKDFAGNLYHTGNWPHEPVDVDFSGQRVGVIGTGSSGIQVSPQIAKQAA

ELFVFQRTPHFAVPARNAPLDPEFLADLKKRYAEFREESRNTPGGTHRYQGPKSALEVSDEELVETLERY  
WQEGGPDILAAYRDILRDRDANERVAEFIRNKIRNTVRDPEVAERLVPKGYPFGTKRLILEIDYYEMFNR  
DNVHLVDTL SAPIETITPRGVRTSERYELDSLVLATGFDALTGALFKIDIRGVGNVALKEKWAAGPRTY  
LGLSTAGFPNLFFIAGP **GSPSVLSNMPVSI EQHIDWIADLLQHMREHDIKSVEAEADA EKAWVVHVNEVA**  
**EPTMFMQANSWYLGANI PGKPRVFMPYAGGVGTYRKKCNEVADNGYEGFILGAGRRGAETVKS**

## 6. Supporting references

- (1) M. W. Fraaije, J. Wu, D. P. H. M. Heuts, E. W. van Hellemond, J. H. Lutje Spelberg, D. B. Janssen, *Appl. Microbiol. Biotechnol.* 2005, **66**, 393.
- (2) (a) H. Dudek, G. de Gonzalo, D. E. Torres Pazmiño, Piotr Stepniak, L. S. Wyrwicz, L. Rychlewski, M. W. Fraaije, *Appl. Environ. Microbiol.* 2011, **77**, 5730; (b) F. Zambianchi, P. Pasta, G. Ottolina, G. Carrea, S. Colonna, N. Gaggero, J. M. Ward, *Tetrahedron: Asymmetry* 2000, **11**, 3653; (c) V. Alphand, R. Furstoss, S. Pedragosa-Moreau, S. M. Roberts, A. J. Willetts, *J. Chem. Soc. Perkin Trans. 1* 1996, 1867.
- (3) D. E. Torres Pazmiño, A. Riebel, J. de Lange, F. Rudroff, M. D. Mihovilovic, M. W. Fraaije, *ChemBioChem* 2009, **10**, 2595.
- (4) F. Forneris, R. Orru, D. Bonivento, L. R. Chiarelli, A. Mattevi, *FEBS J.* 2009, **276**, 2833.
